# Supplementary material
Source: ML conference proceedings conference paper supplement (https://proceedings.neurips.cc/paper_files/paper/2019/hash/17b3c7061788dbe82de5abe9f6fe22b3-Abstract.html)

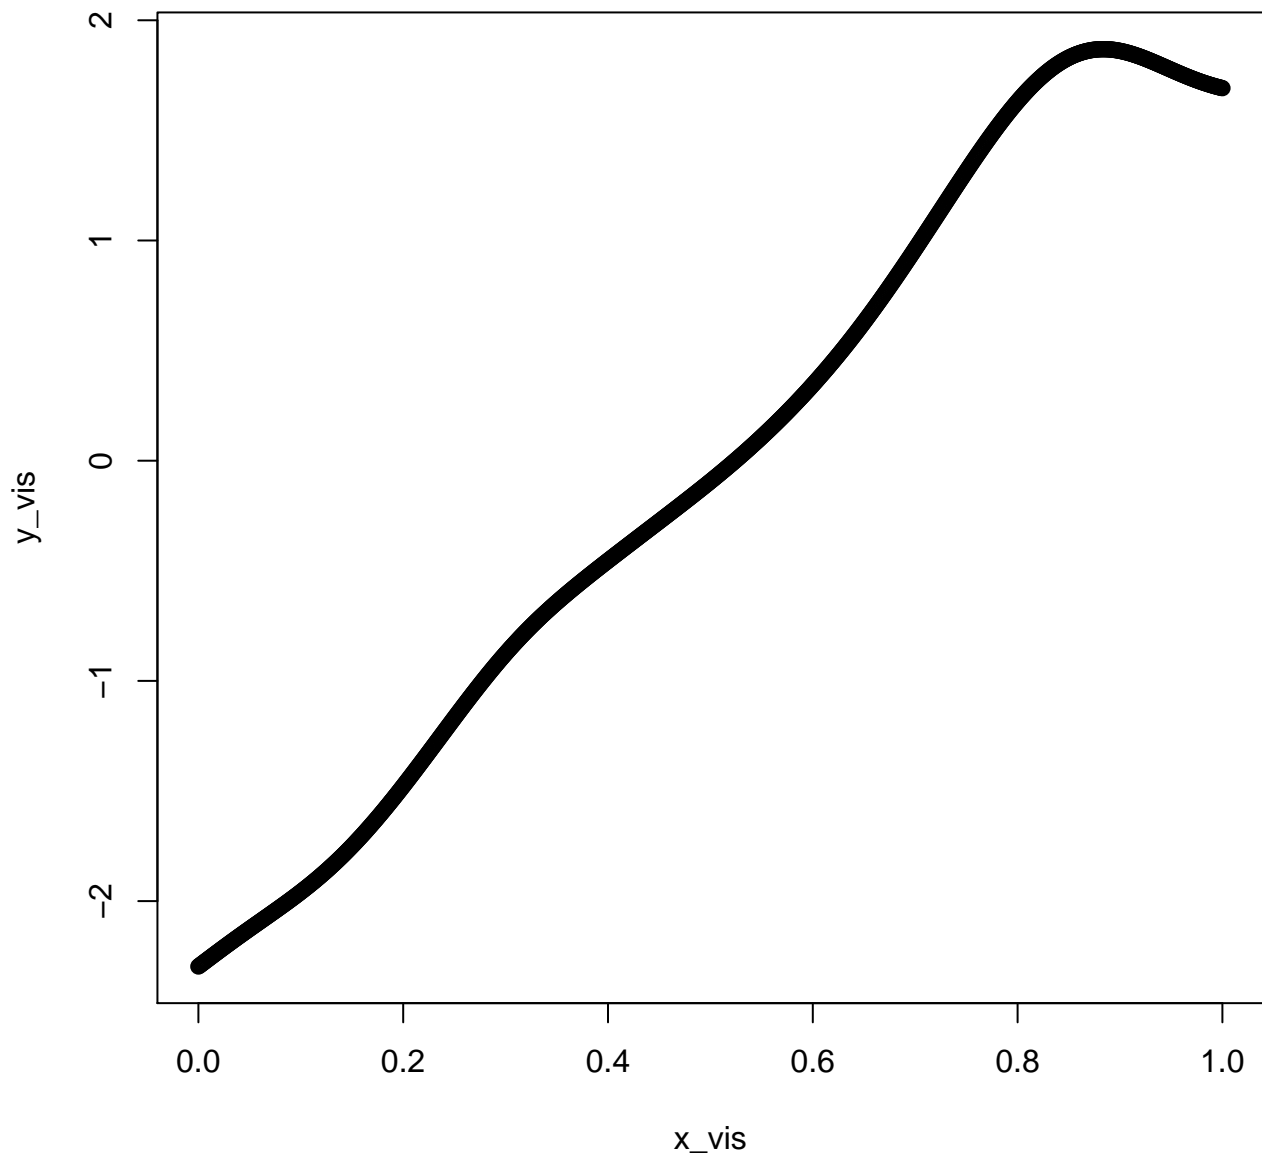

Supplement: Supplementary file [file 17b3c7061788dbe82de5abe9f6fe22b3-Supplemental.zip]
